# Supplementary material for: A lncRNA identifies Irf8 enhancer element in negative feedback control of dendritic cell differentiation
Source: eLife journal article supplement (doi:10.7554/elife.83342), 2023-03-14
Supplement: supp [file elife-83342-supp-v1.zip]

**A**

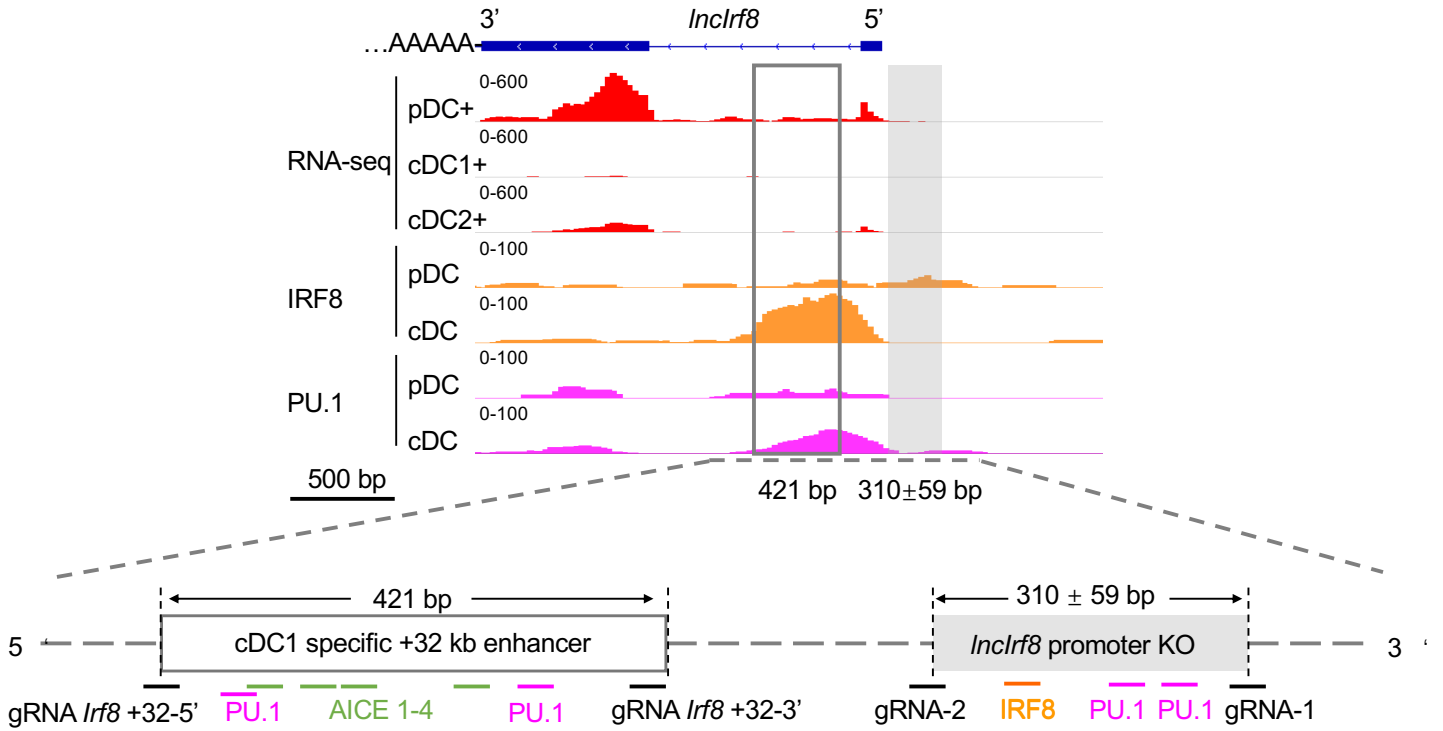

**B**

5'- CTGTGTTCTGGGCTGTGGTCATTCTATTGTATTGTCTATAGAACAAAGTAGCTCTTGACGGCTTTGAGGCAAGGGTTGTGATCTTTGAGGTAGAG *gRNA Irf8 +32-5'*

GGCCATTCTTTCCATGCAGAGGAGACCCTGACTGGGGTGCAGAATGTCGTCCTGTGGATGTGCAGCCAGCTACCCCCACCCCCACCCCCA *PU.1* *AICE 1* *AICE 2* *AICE 3* *TAT*

*CTCTTCTTG* *TTTCTATTCA* *GGT* *TCTCCTTCTGA* *ATTTCAGTTTG* *CTCAAGTTCCTGCCTGGCTGCCTGCTCTGGCTGGGAGCAGAGTTTCAGGGAT*

*CCTGCCTGTCAAGGTAGTTCCACAACACCGGTTCCCGAGGTTACTCACGCACCTCT* *AICE 4* *TGATAAGAAA* *ACCGAAAGGTGAACTTGGACATTGAGGAC*

*GCC* *AGCAACTTCCTGAATC* *CAGCCGTGCTACCCCCACCCCAAAGGACGAGTGACTCCCCAAGAGGAATCACTGGAGGAAACCCTGAGTTTTCGAT*

*gRNA Irf8 +32-3'*

*GGCCCTGGAAAGGGA* *AACTGGCCTGGGGCAGGT* *CTGTTTCAGGATCGCACCTCACCTACTGGGTGAGGGAGGGGGGCAAAGTAAGGGGGAGACC*

*CCTAGCAGGGCCCCAGAGGTAGGATTCTTAC* *IncIrf8 exon 2* *CATGCTTTGCTGGGACCTGGTGTTCCTCAGCCCCCTGCATCTGACAGT* *GCTGGCTTCATGGCAG*

*gRNA-2*

*GGTCATGAGGTTGCAACATAGTTGCTGGGGTTTCCTGCAGCCAATGCTGGTCC* *AGGTGCCGAGAAAGGACACGT* *GGGAGACAGAATTAGACCCCCA*

*IRF8*

*TGGAAAAACCACCACCCAGCCTGATGCTTGT* *AGCTTCACTTCAGG* *ACCCACACCCTGTAAGTACTTTGATTCTGGACTGACATCAAATTGGCTTTG*

*ACCCTGTCTTTTACAGCAGTCCCCCTCCAAAGTCAAGGGCAGGATCCTGG* *PU.1* *STATGGGTCTTTCTCTCTATC* *CCACAGGCTGGGCTGTCTAGGTAGCT*

*gRNA-1*

*GCTATCTCCA* *PU.1* *GTGGCTGATTTCCTCTCCCA* *GCCCCCTGGGTATCTTAGTATAA* *BATF3* *PU.1* *TGGAGAGTCAATCCTGTGCAGT* *GCTCCTCAAATGACAGGCACA*

*GTCTGGGTACACGGGAAACATATGCATTGAGTACAAGGGGACCCTAAACCTACTCACT* -3'

AICE: AP-1-IRF composite elements  
PU.1 (SPI1, SPI-A)
