# Supplementary figures and images for: A lncRNA identifies Irf8 enhancer element in negative feedback control of dendritic cell differentiation
Source: eLife journal article supplement (doi:10.7554/elife.83342), 2023-03-14

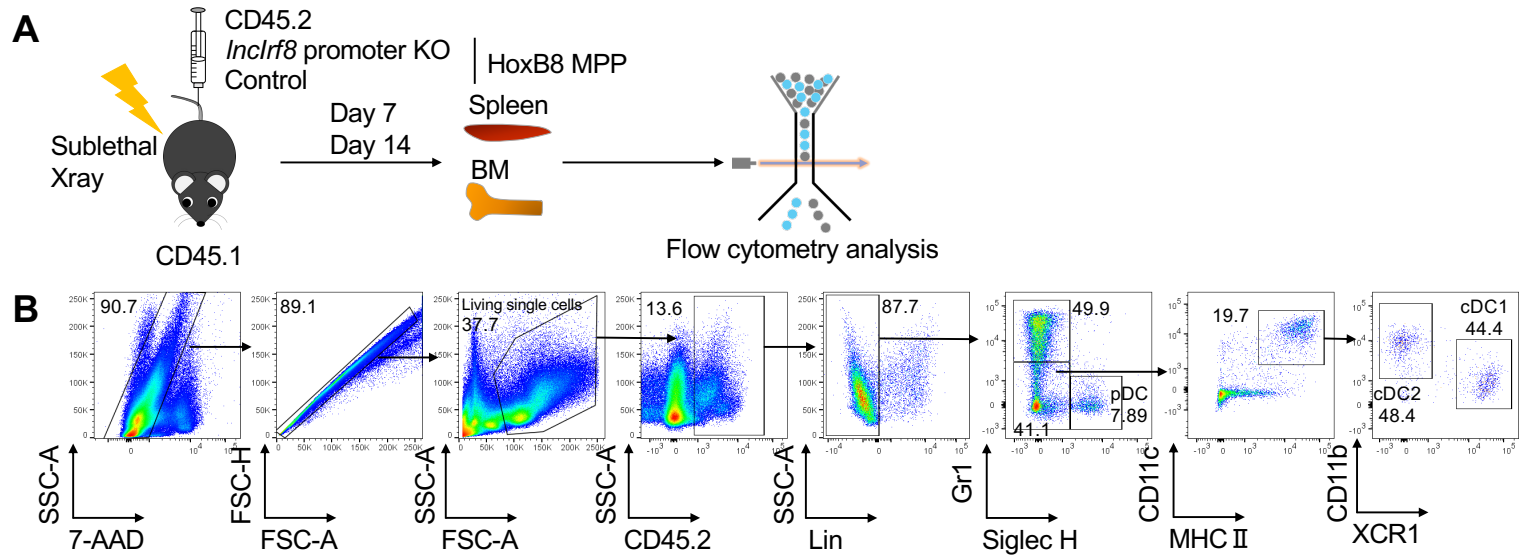

Supplement: supp [file elife-83342-supp-v1.zip]

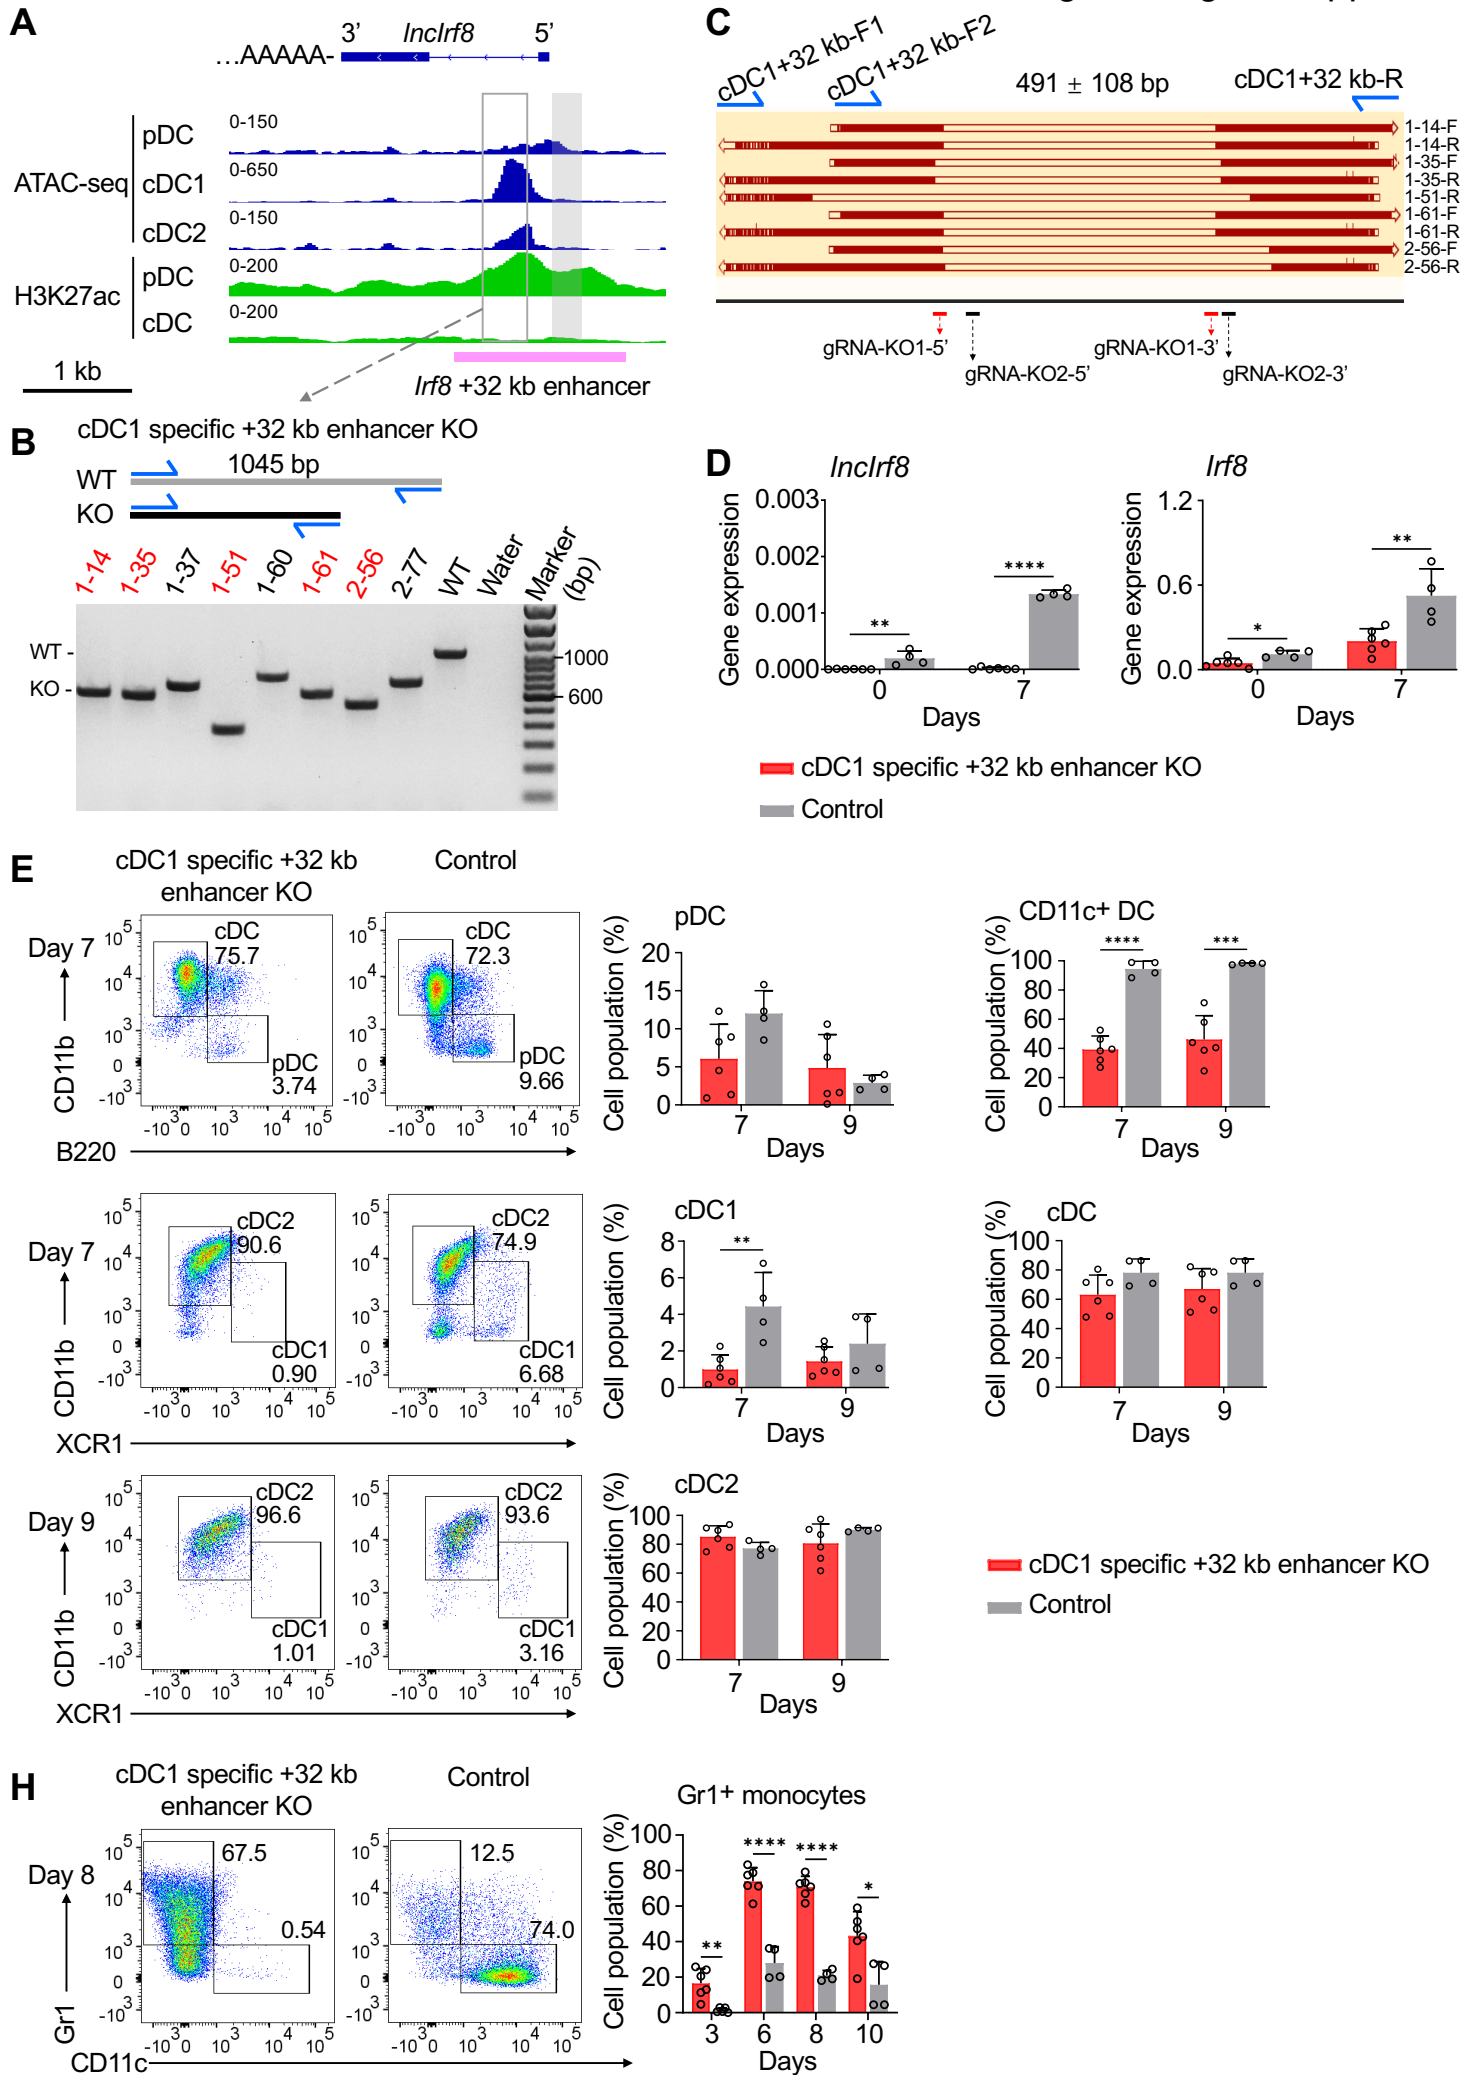

Supplement: supp [file elife-83342-supp-v1.zip]

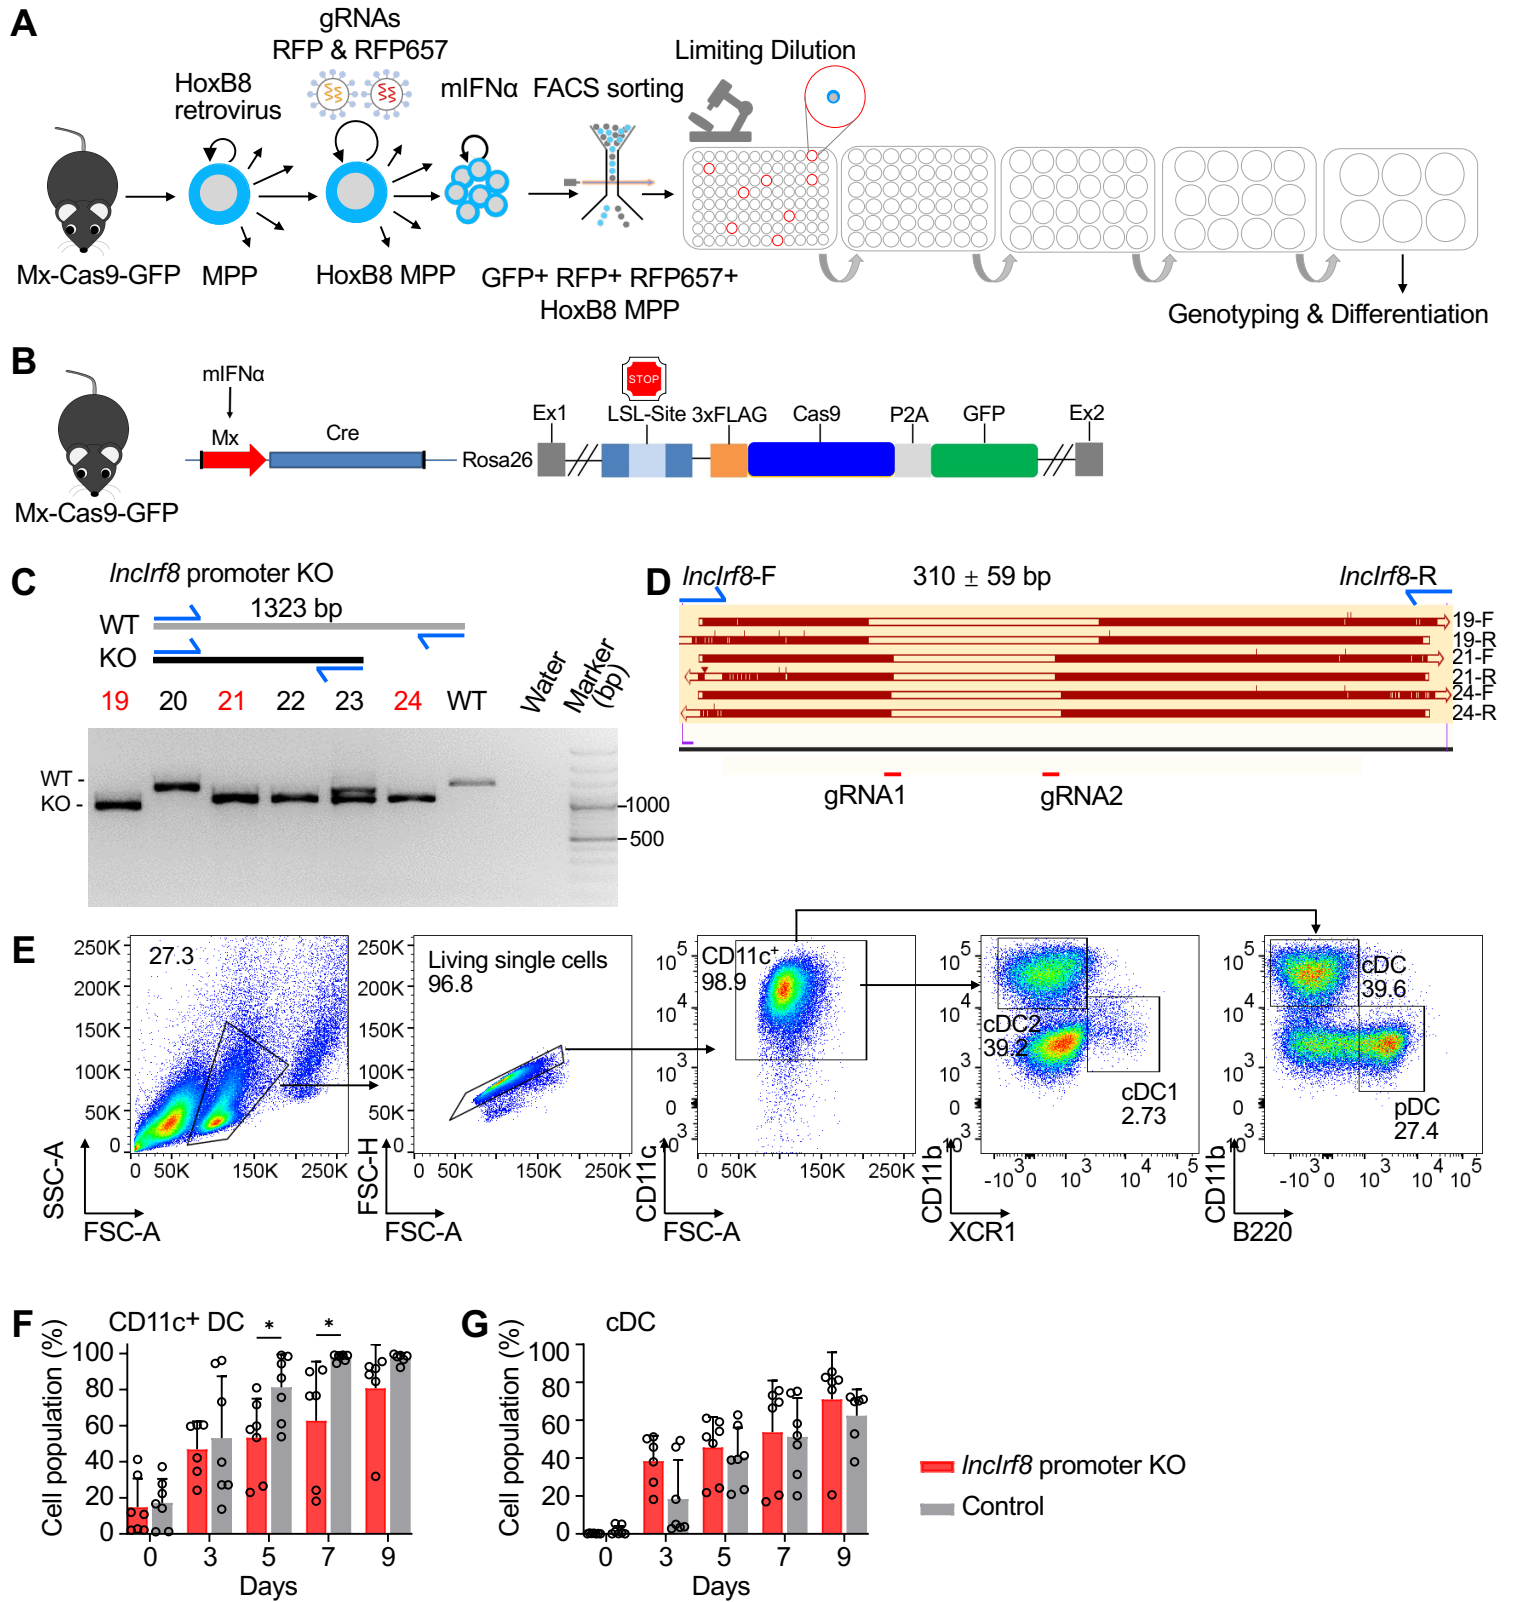

Supplement: supp [file elife-83342-supp-v1.zip]

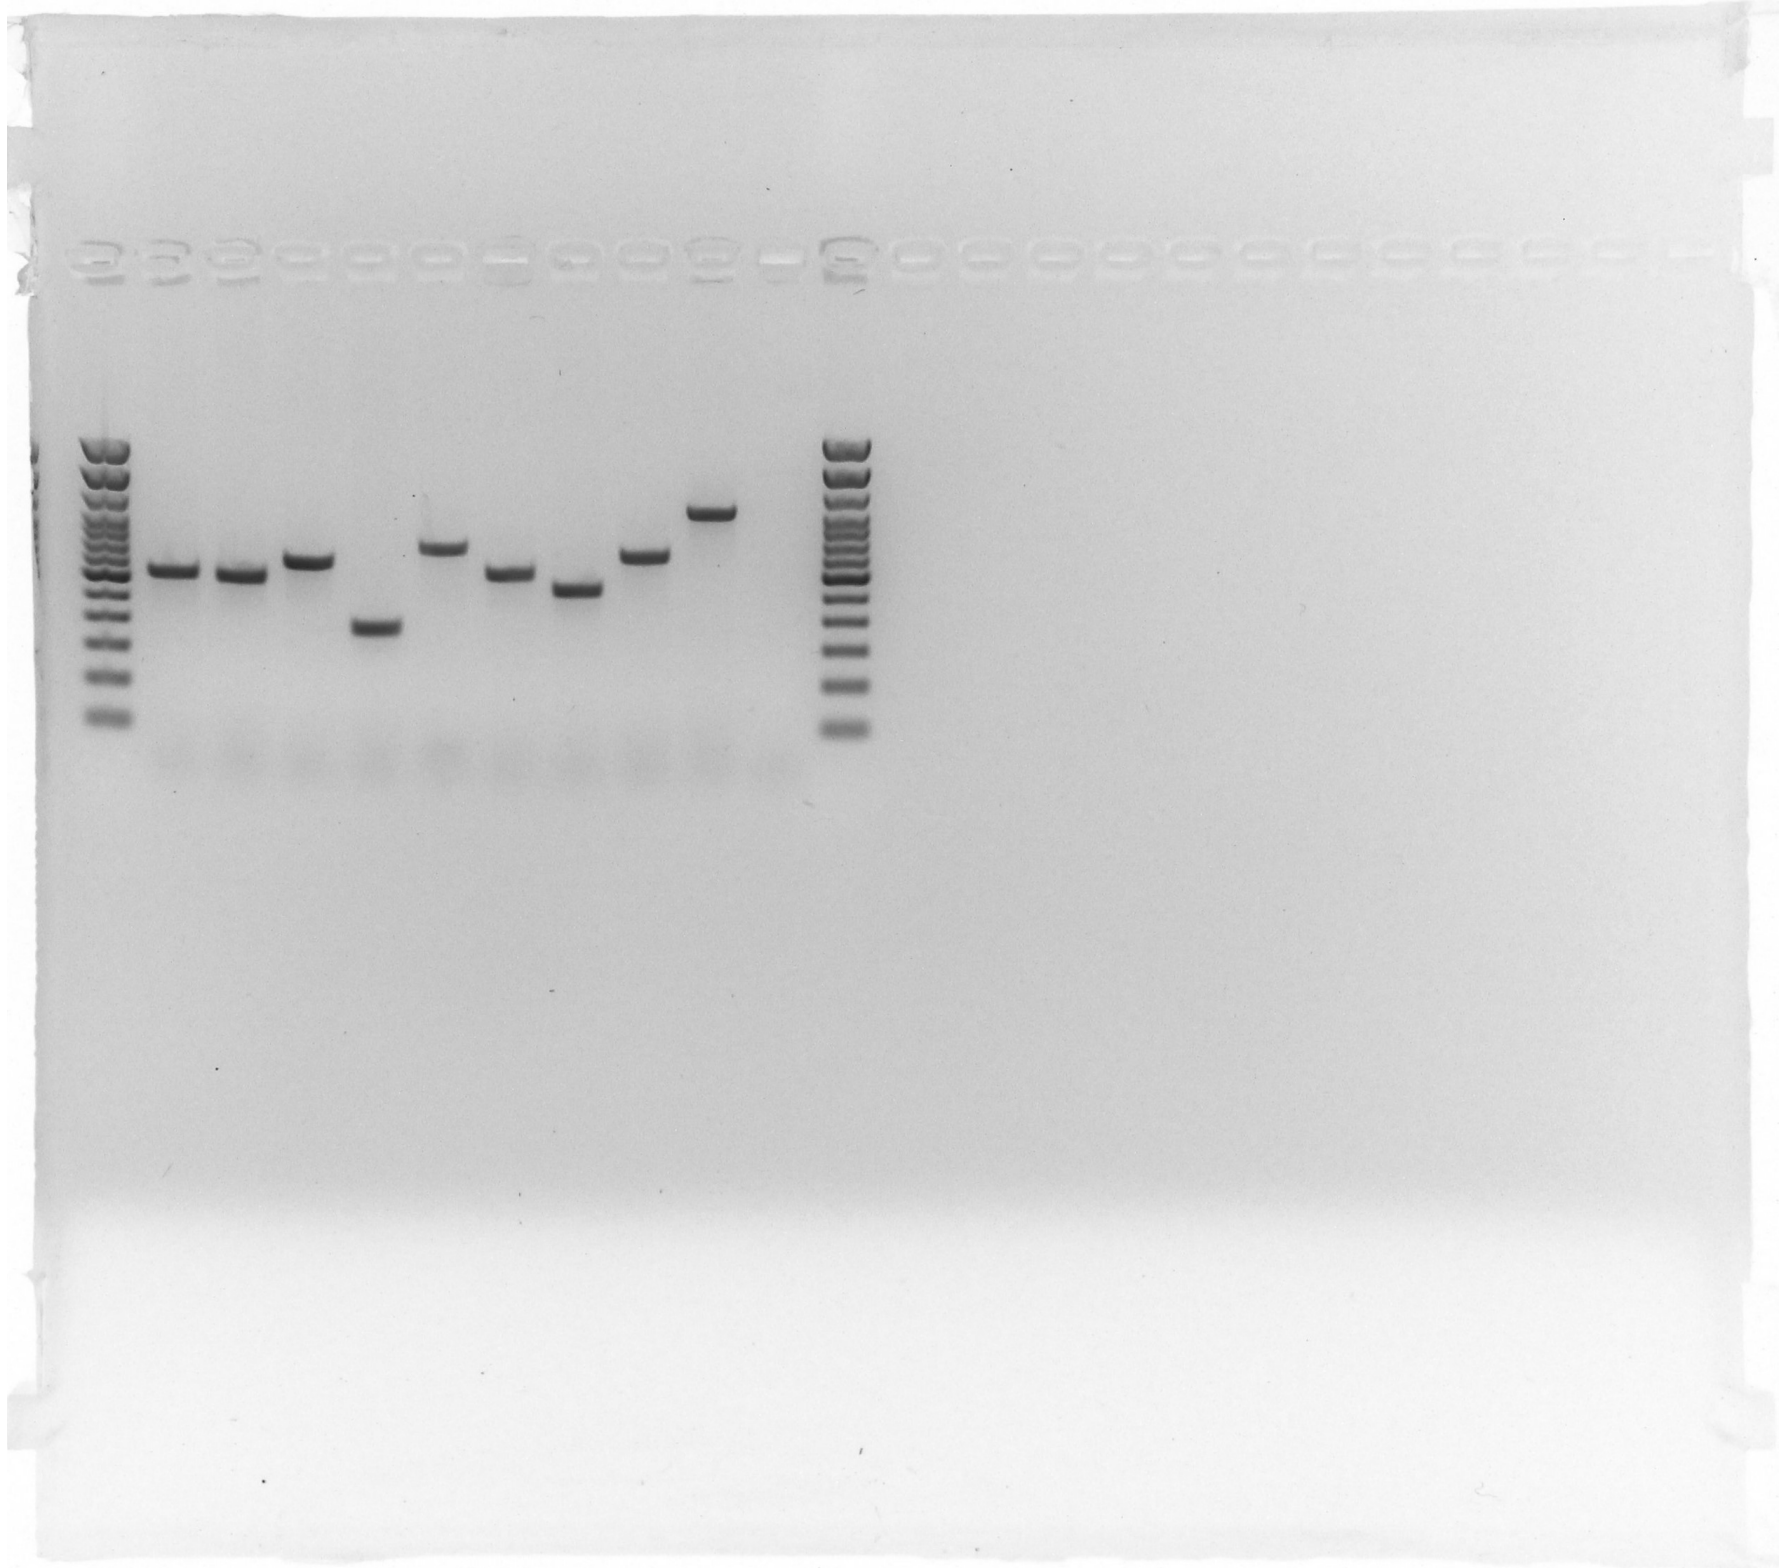

Supplement: supp [file elife-83342-supp-v1.zip]

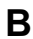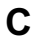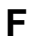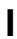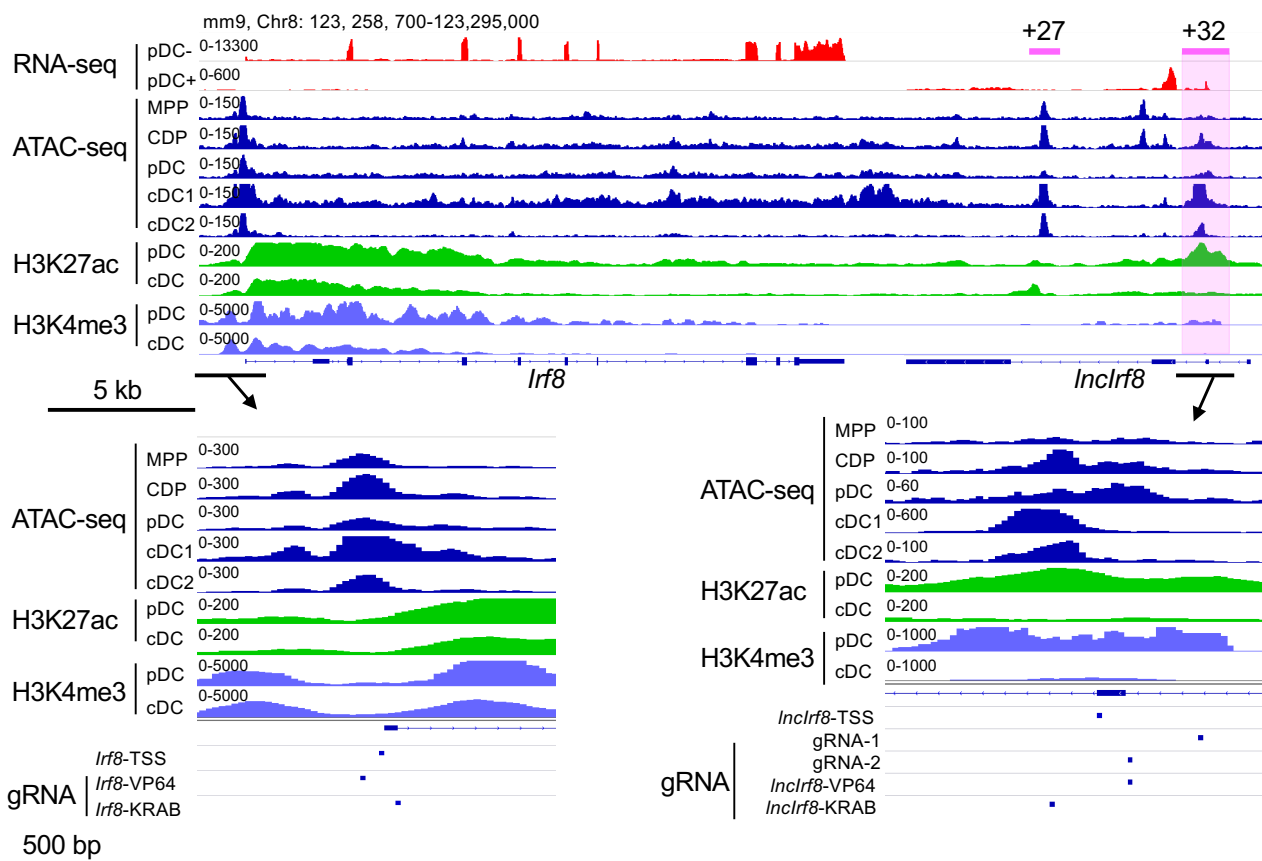

Supplement: supp [file elife-83342-supp-v1.zip]

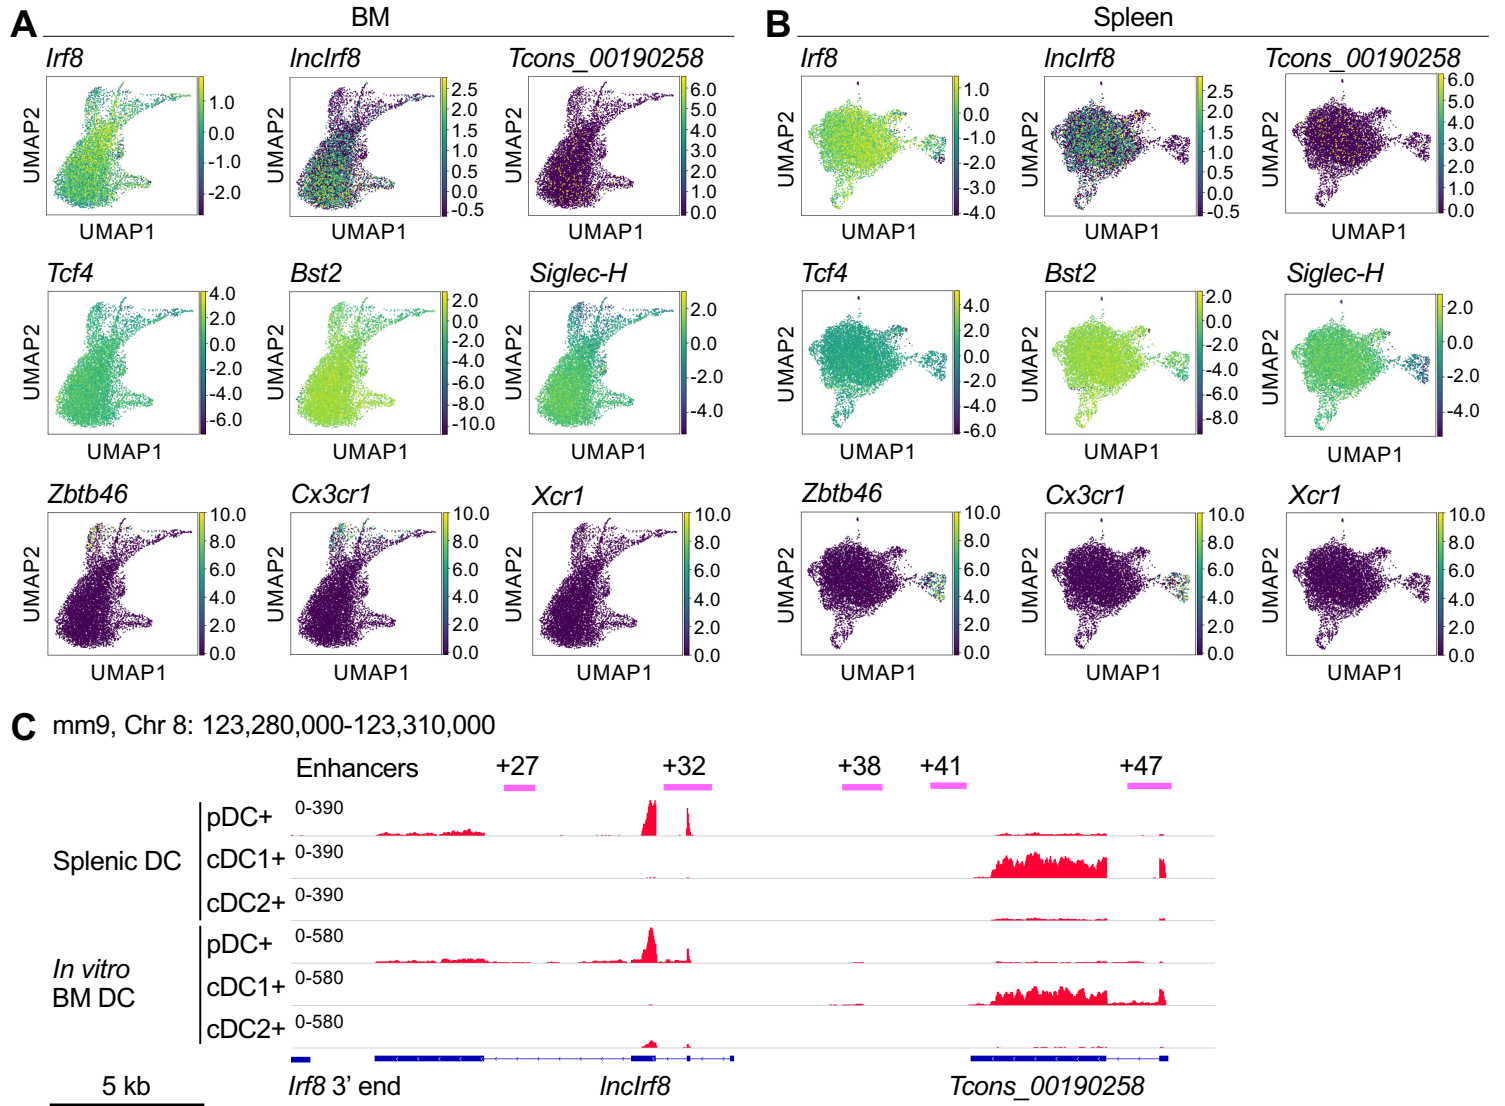

Supplement: supp [file elife-83342-supp-v1.zip]

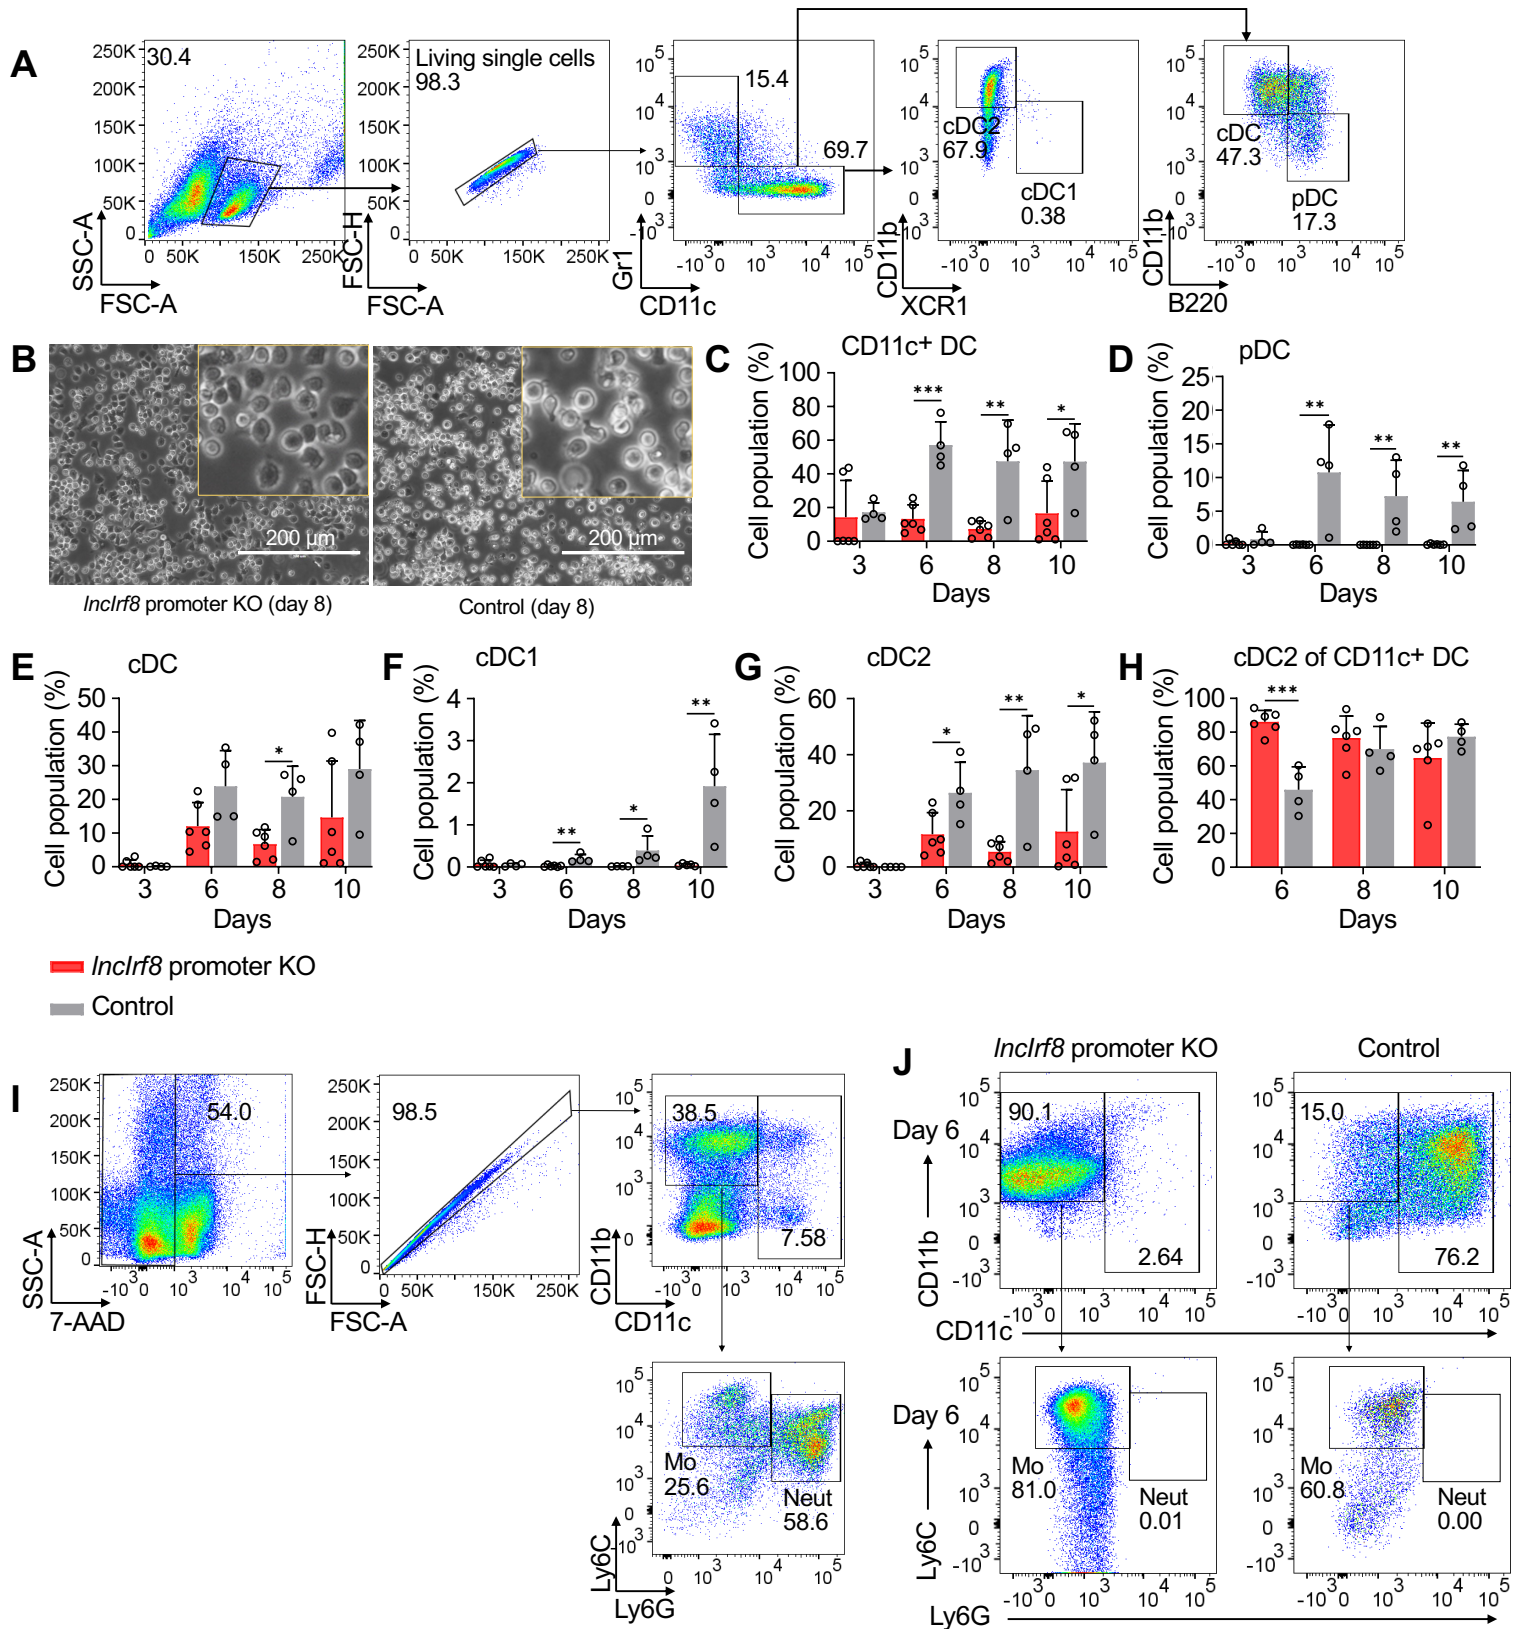

Supplement: supp [file elife-83342-supp-v1.zip]

**A**

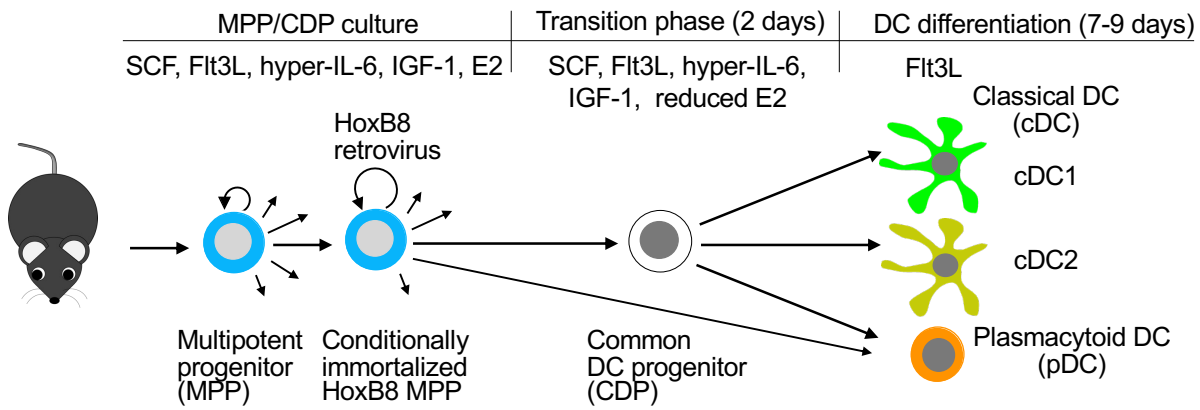

**B**

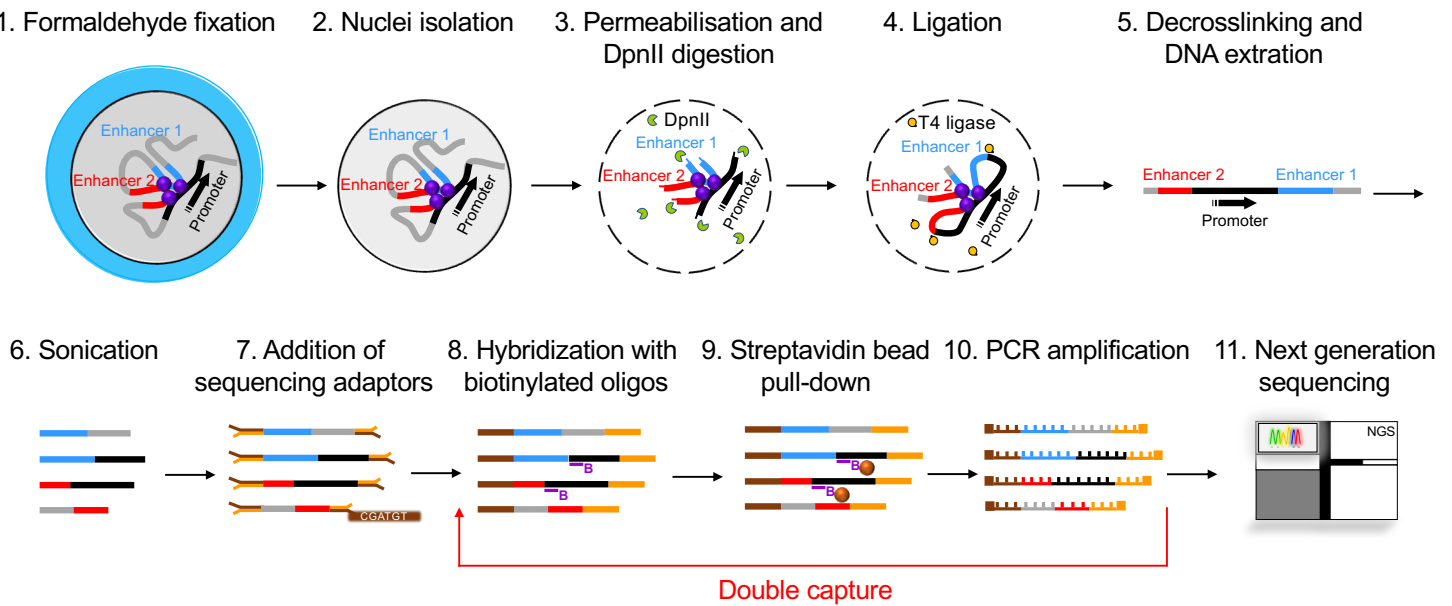

**C**

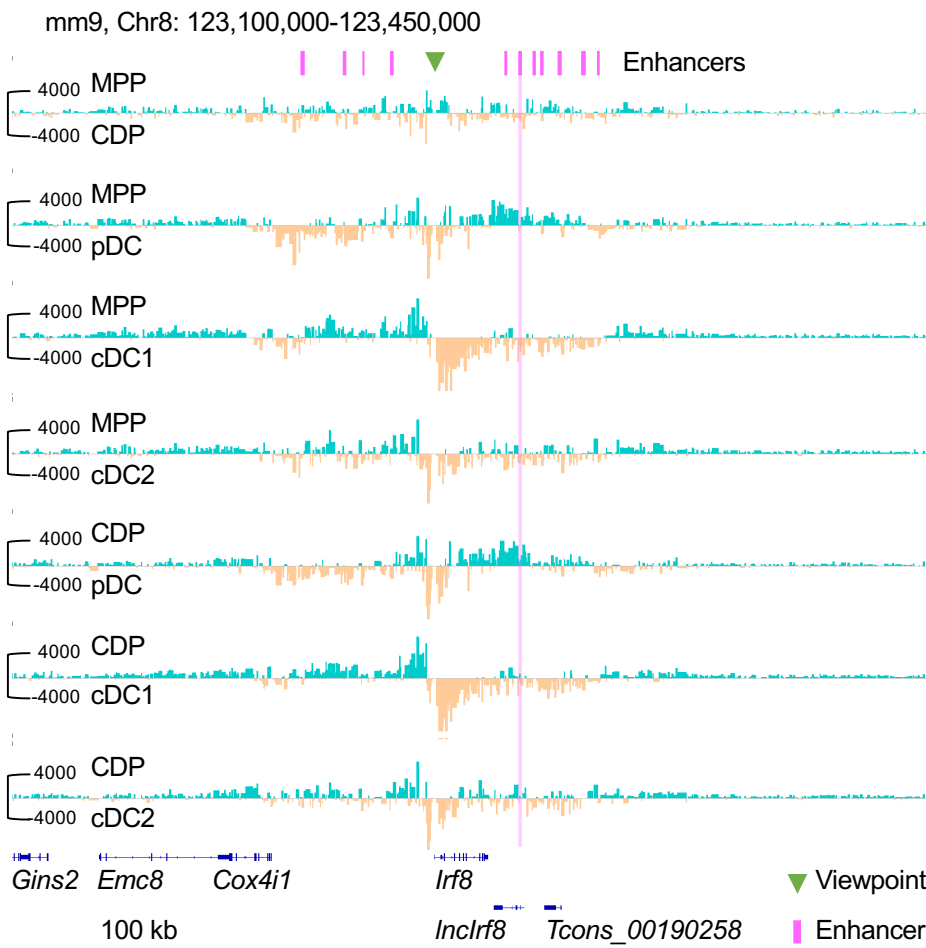

Supplement: supp [file elife-83342-supp-v1.zip]

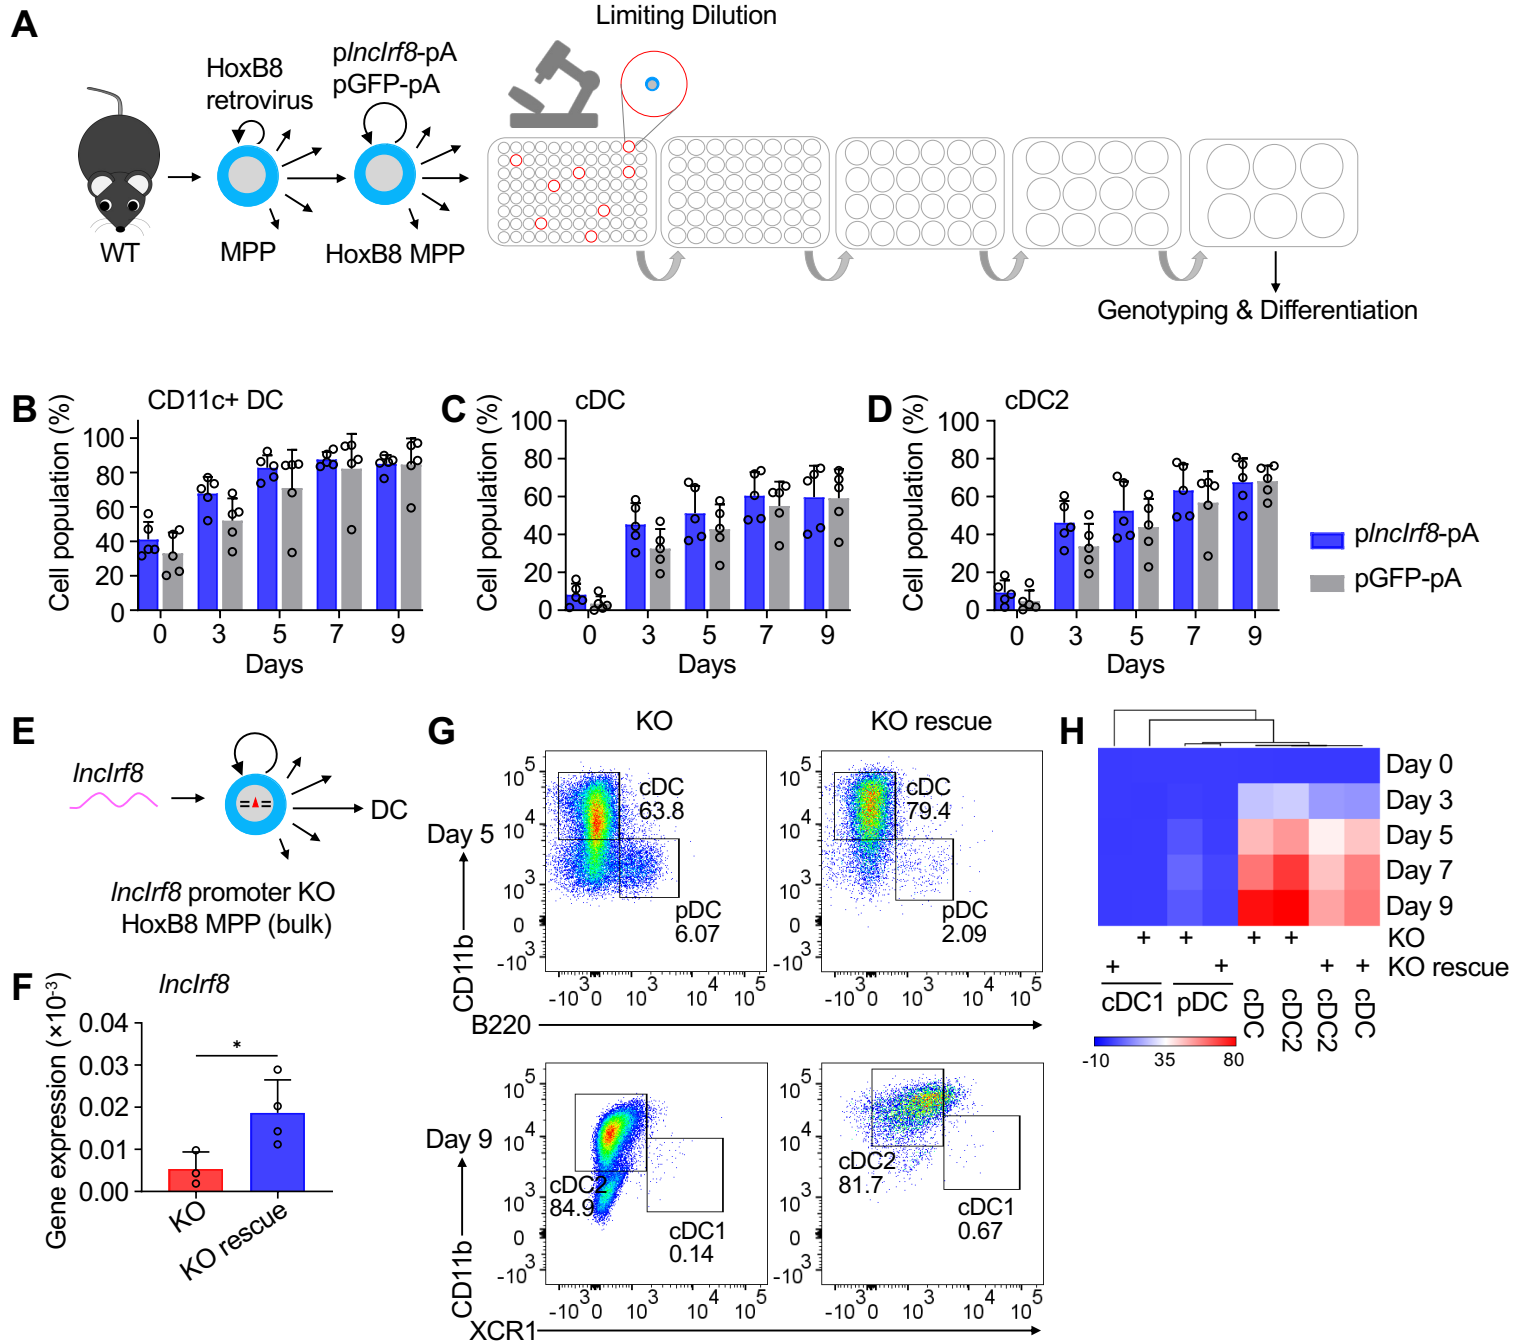

Supplement: supp [file elife-83342-supp-v1.zip]

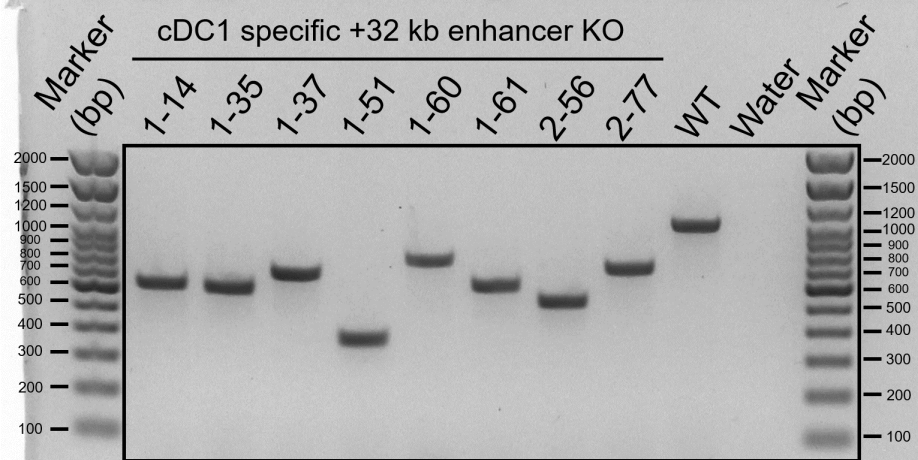

Figure 2-figure supplement 4-source data 2

Supplement: supp [file elife-83342-supp-v1.zip]

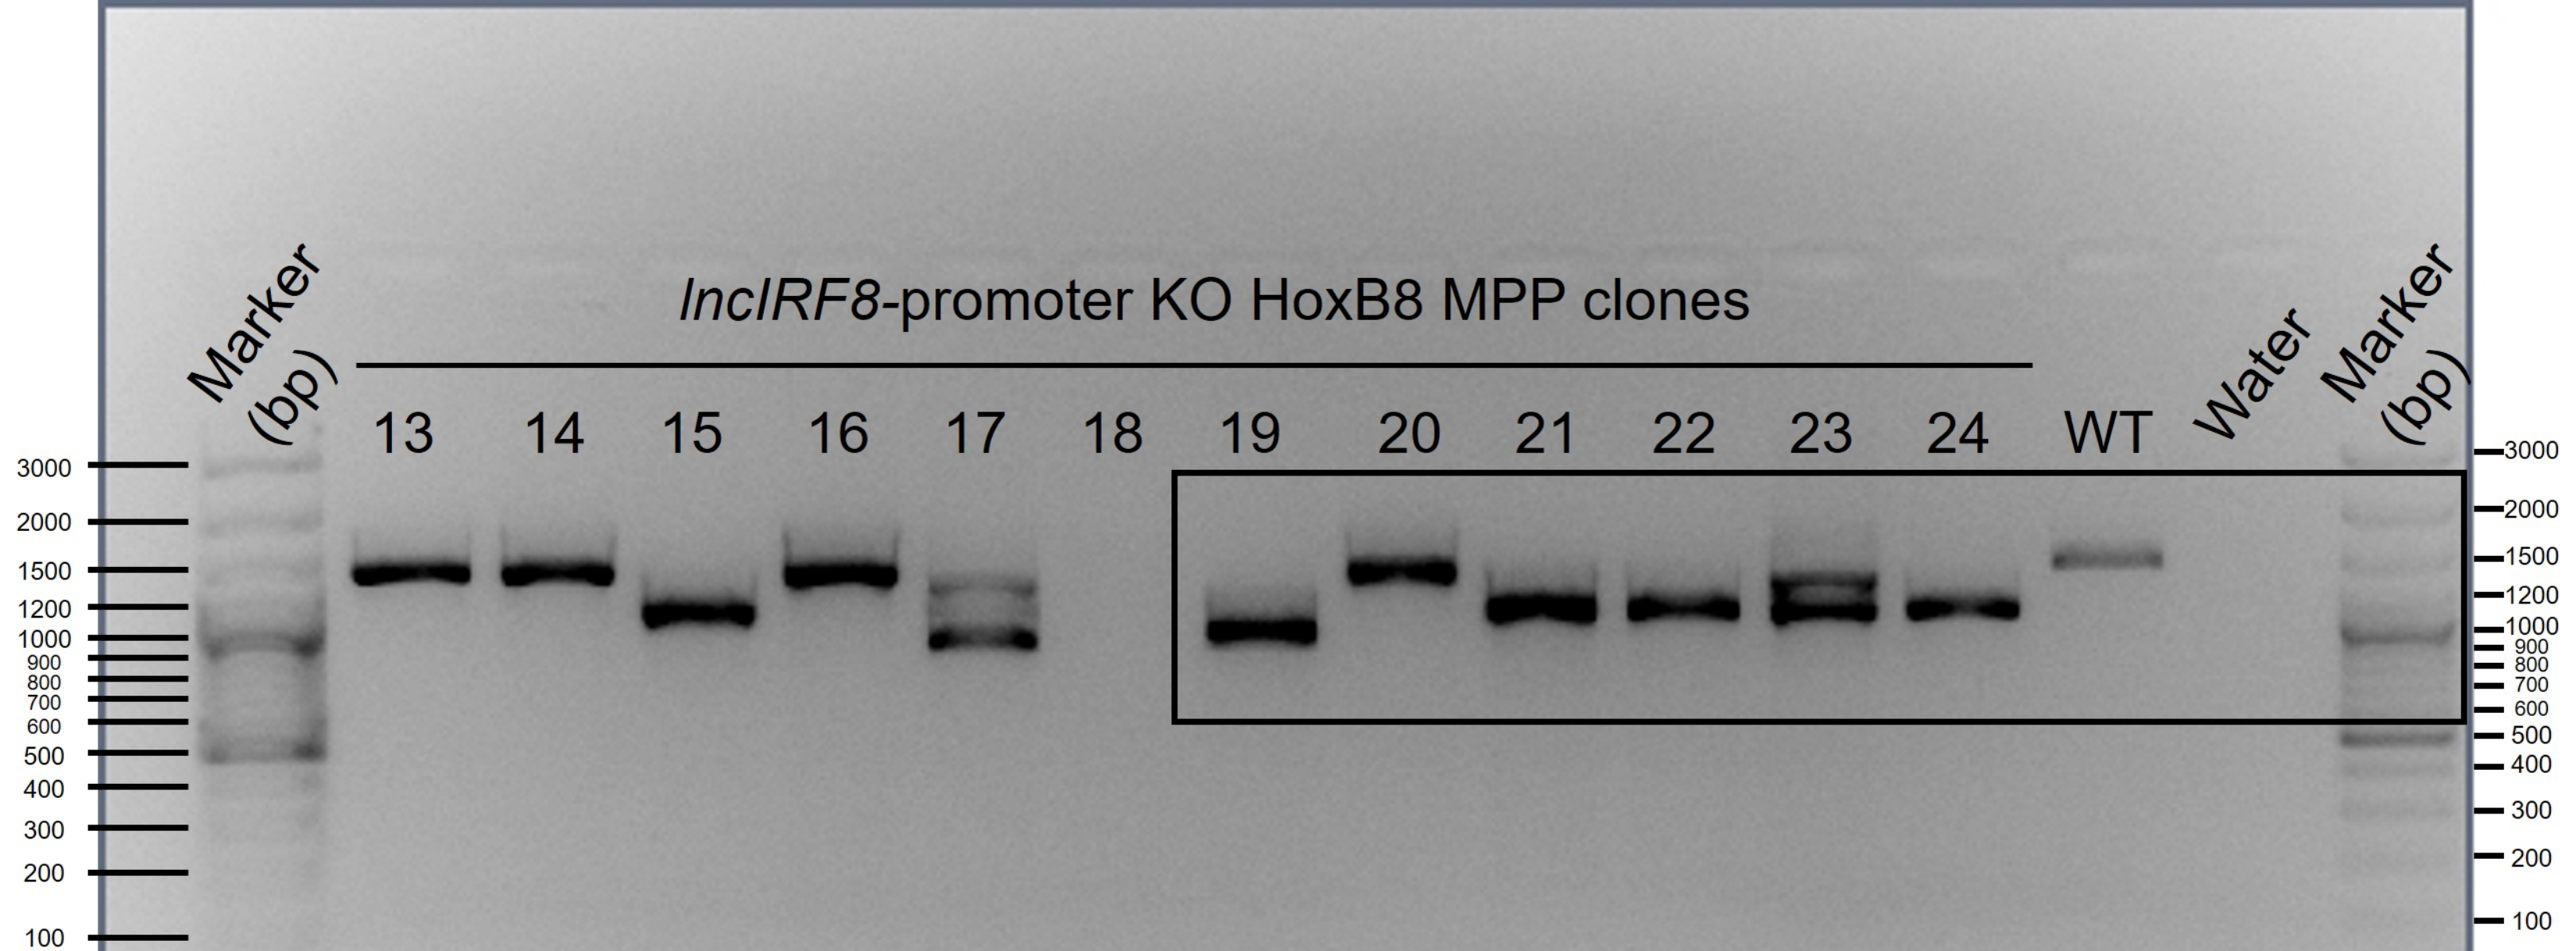

Figure 2-figure supplement 1-source data 2

Supplement: supp [file elife-83342-supp-v1.zip]

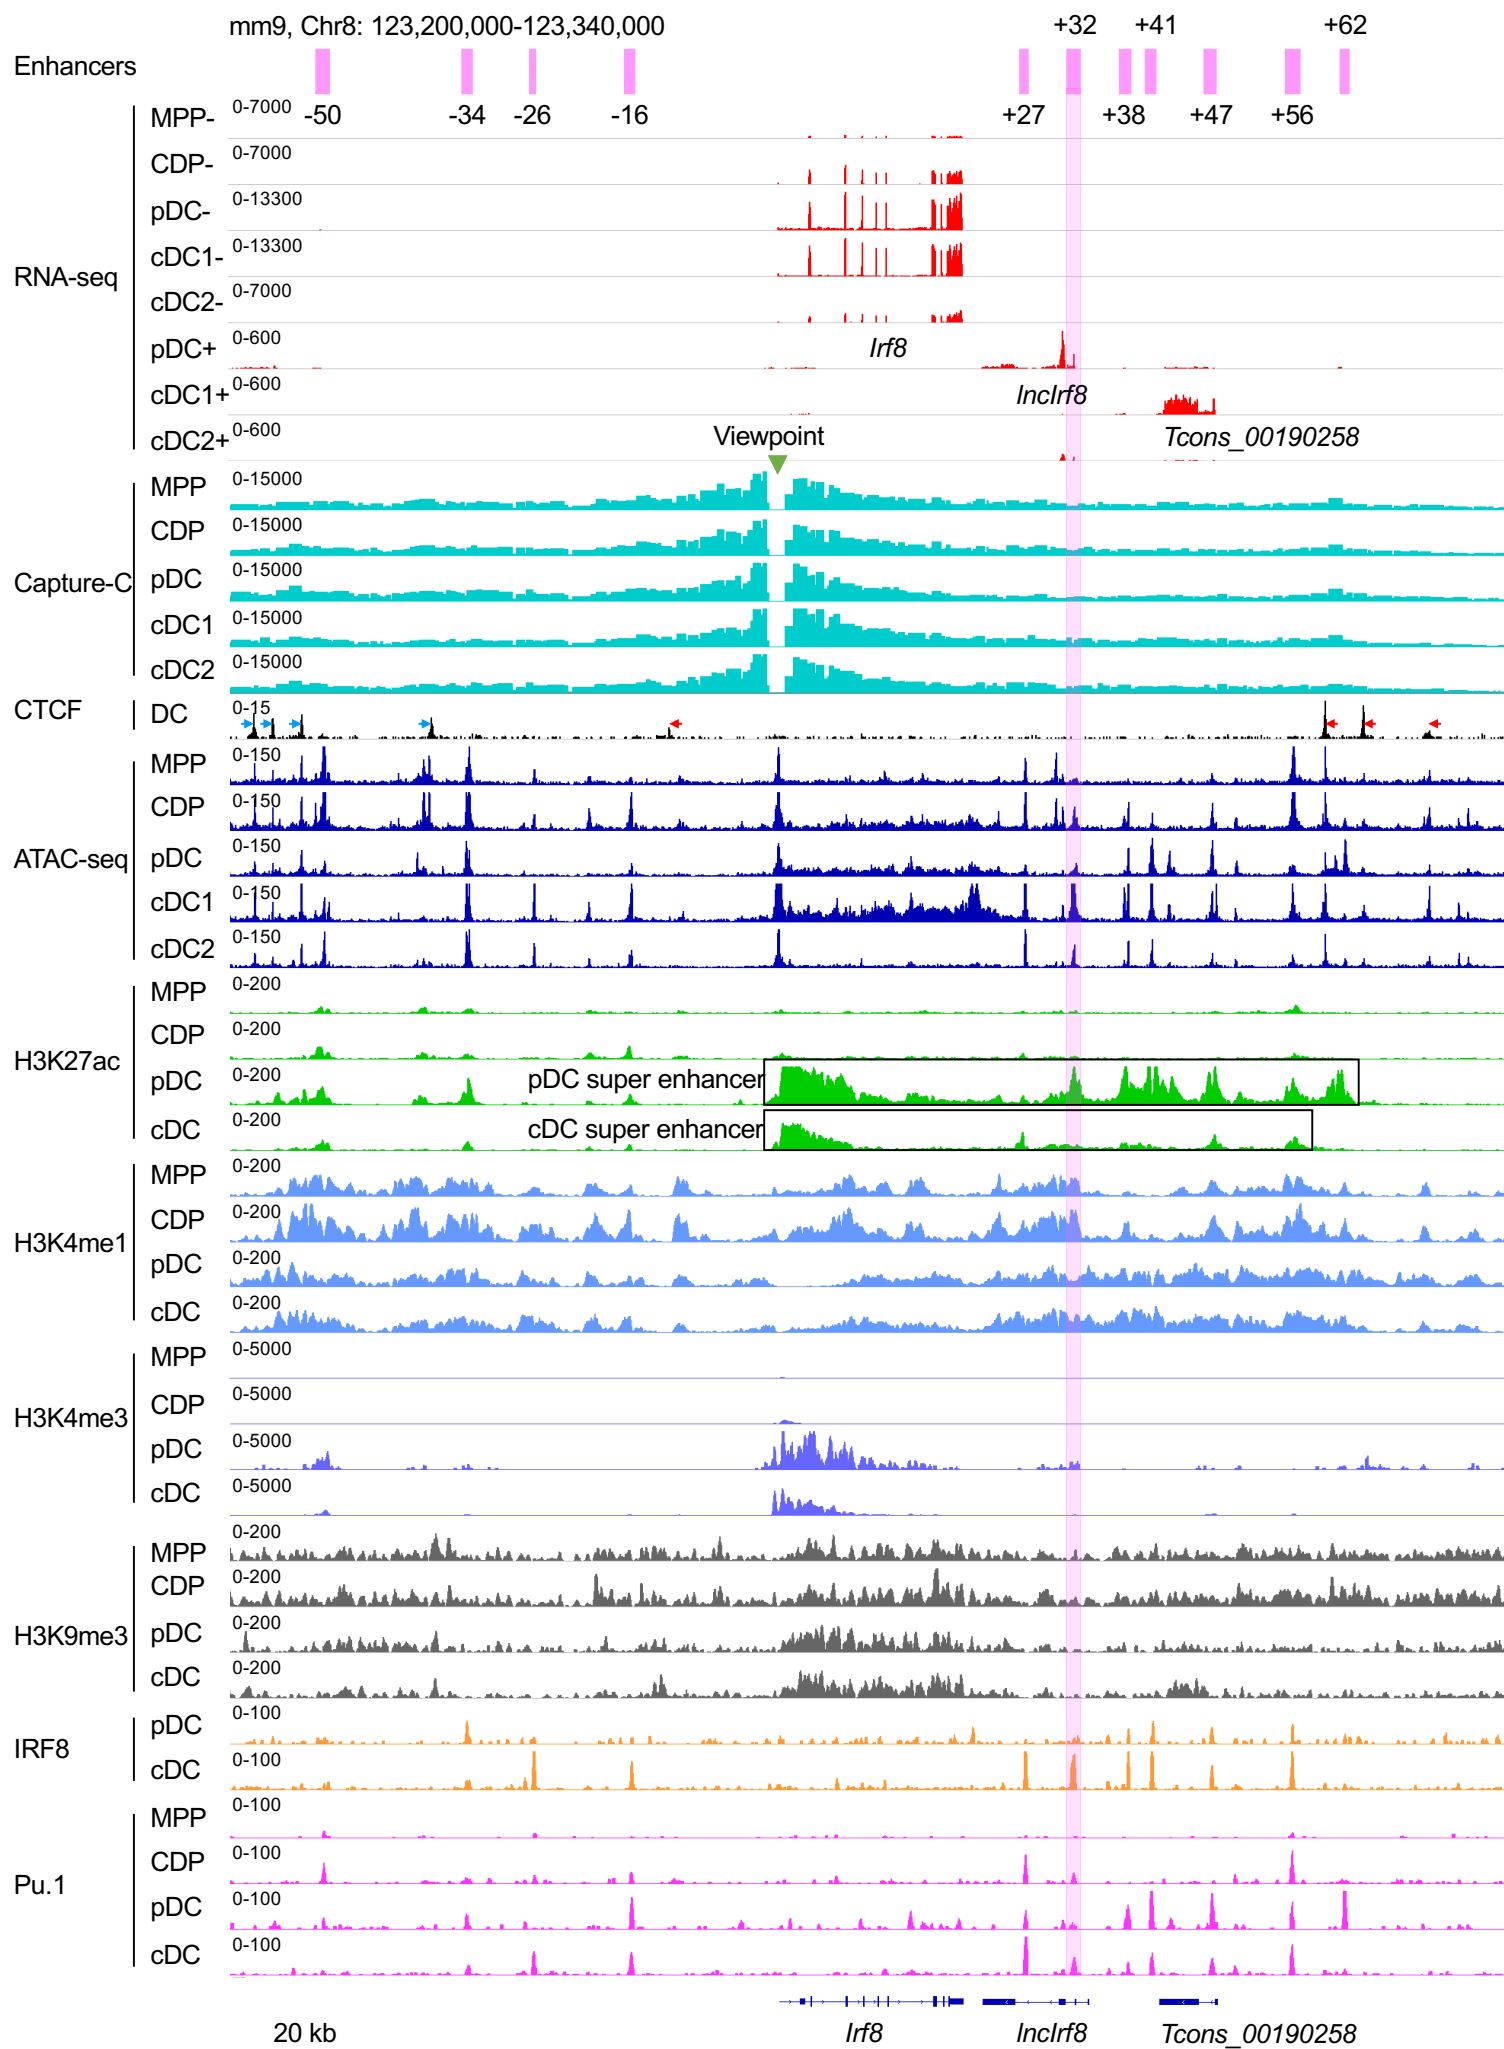

Supplement: supp [file elife-83342-supp-v1.zip]

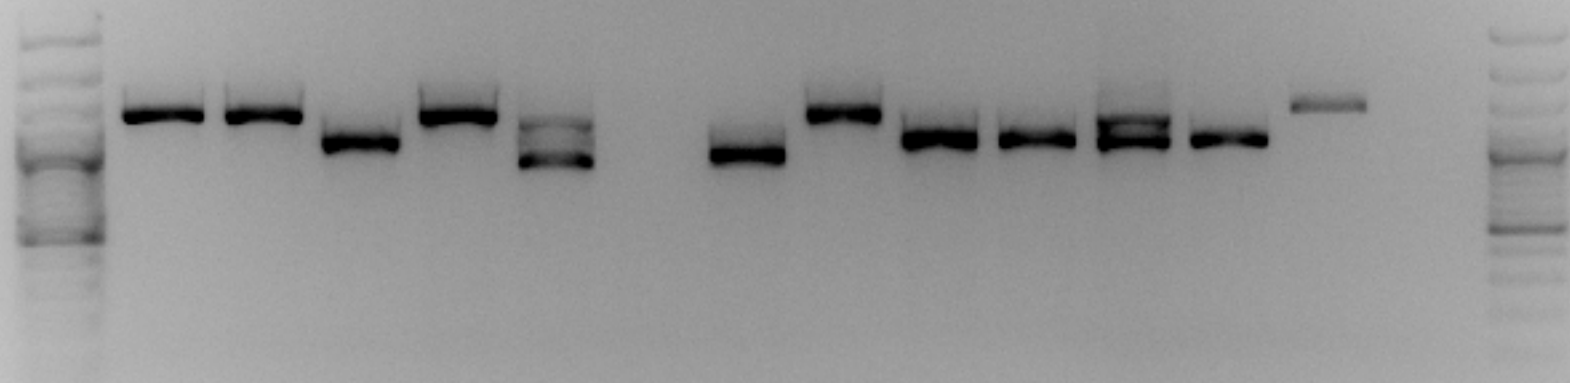

Supplement: supp [file elife-83342-supp-v1.zip]
